# Supplementary material for: A reactive molecular dynamics study on the anisotropic sensitivity in single crystal α-cyclotetramethylene tetranitramine
Source: Royal Society of Chemistry journal article supplement (doi:10.1039/c4ra09943e), 2014-12-16
Supplement: c4ra09943e1.pdf [file c4ra09943e1.pdf]

## Electronic Supplementary Information (ESI)

### A Reactive Molecular Dynamics Study on the Anisotropic Sensitivity in Single Crystal

#### $\alpha$ -Cyclotetramethylene Tetranitramine

(Ting-Ting Zhou, Yan-Geng Zhang, Jian-Feng Lou, Hua-Jie Song, Feng-Lei Huang)

**Table S1** The averaged full stress tensors for the seven uniaxially compressed structures after NVT-MD relaxation (unit: GPa)

| Shock plane | $P$    | $P_{xx}$ | $P_{yy}$ | $P_{zz}$ | $P_{xy}$ | $P_{xz}$ | $P_{yz}$ |
|-------------|--------|----------|----------|----------|----------|----------|----------|
| (010)       | 9.549  | 8.544    | 13.447   | 6.657    | 0.181    | 0.237    | 0.089    |
| (001)       | 10.164 | 7.638    | 10.431   | 12.421   | -0.124   | -0.117   | -0.212   |
| (100)       | 10.305 | 11.994   | 9.304    | 9.616    | -0.082   | 0.148    | 0.110    |
| (110)       | 10.218 | 12.396   | 9.411    | 8.845    | 0.013    | 0.017    | 0.080    |
| (011)       | 10.097 | 7.716    | 10.509   | 12.065   | -0.033   | 0.035    | 0.127    |
| (111)       | 10.099 | 8.935    | 9.163    | 12.200   | 0.007    | 0.779    | 0.122    |
| (101)       | 10.484 | 9.397    | 10.068   | 11.985   | -0.363   | 0.913    | -0.082   |

**Table S2.** Bond order cutoff values for various atom pairs. The algorithm of molecule recognition in the fragment analysis uses these values.

|   | C    | H    | O    | N    |
|---|------|------|------|------|
| C | 0.55 | 0.40 | 0.60 | 0.30 |
| H |      | 0.55 | 0.40 | 0.55 |
| O |      |      | 0.65 | 0.40 |
| N |      |      |      | 0.55 |

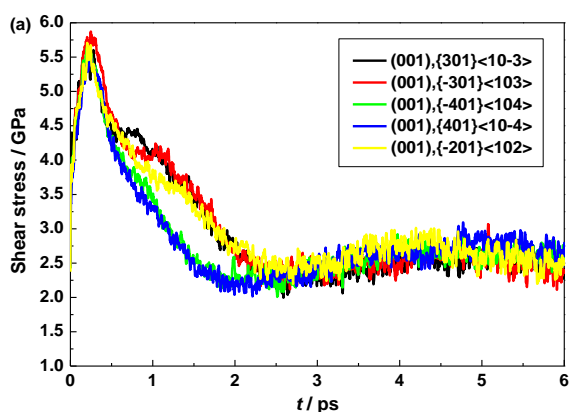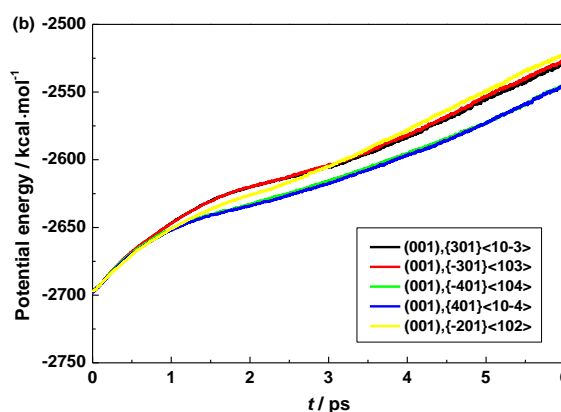

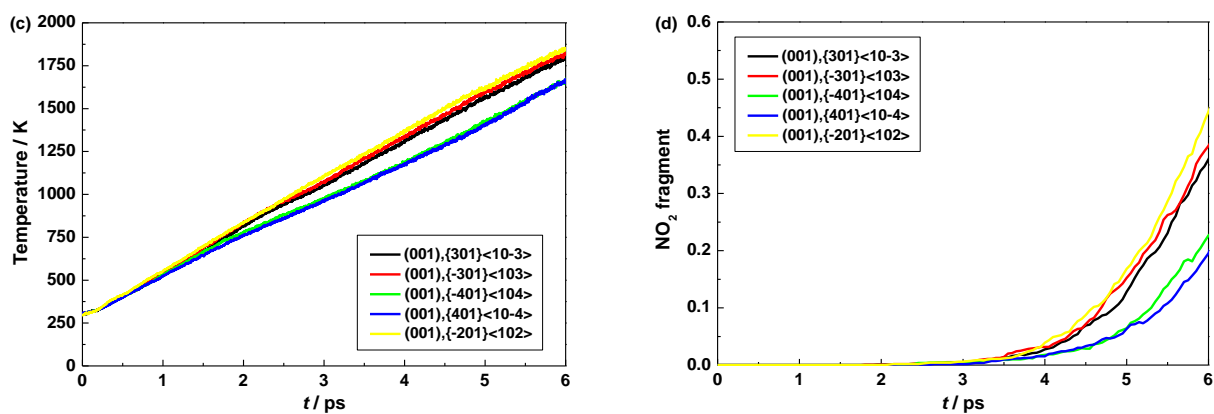

**Fig. S1** Time evolutions of shear stress (a), potential energy per HMX molecule (b), temperature (c), and NO<sub>2</sub> fragment per HMX molecule (d) for the five possible slip systems along shock direction normal to the (001) plane during shear simulations.

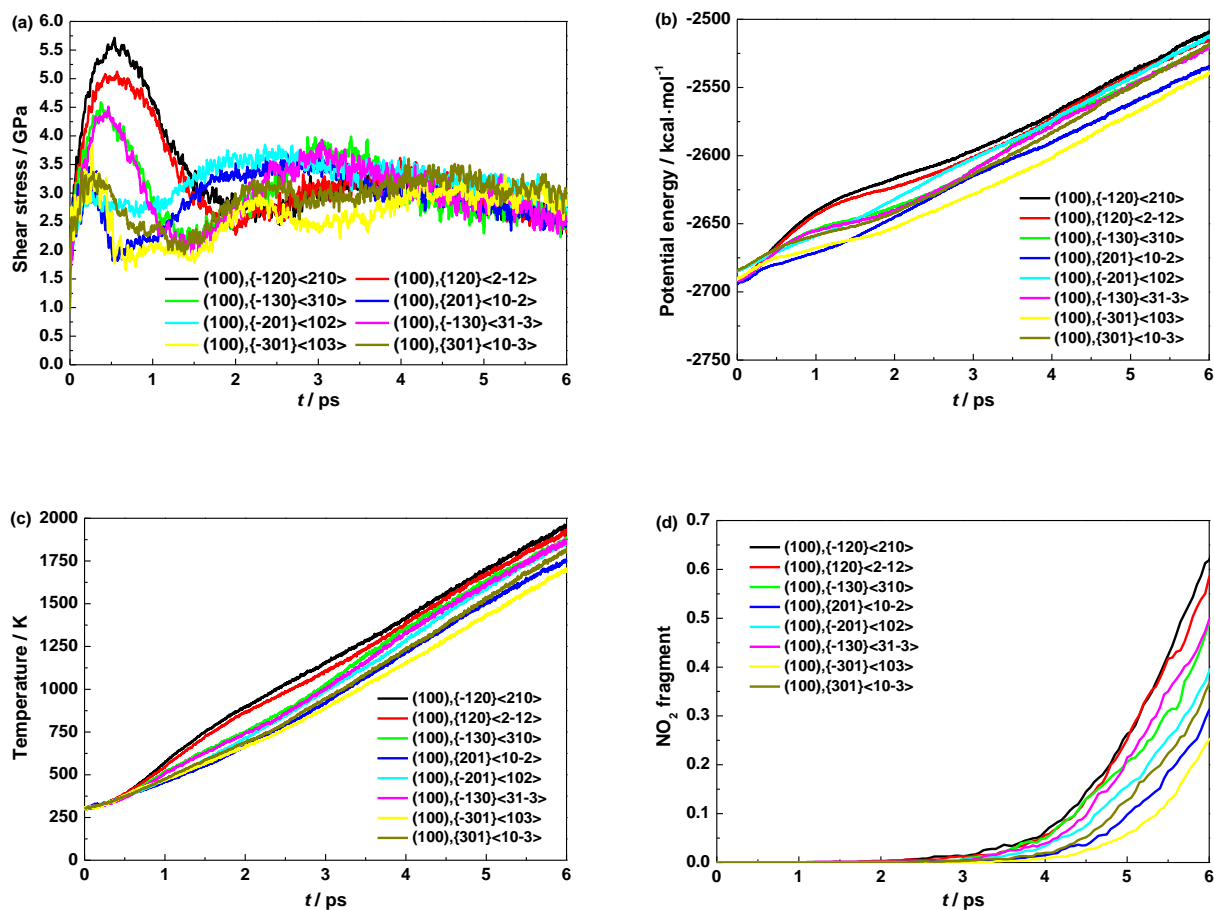

**Fig. S2** Time evolutions of shear stress (a), potential energy per HMX molecule (b), temperature (c), and NO<sub>2</sub> fragment per HMX molecule (d) for the eight possible slip systems along shock direction normal to the (100) plane during shear simulations.

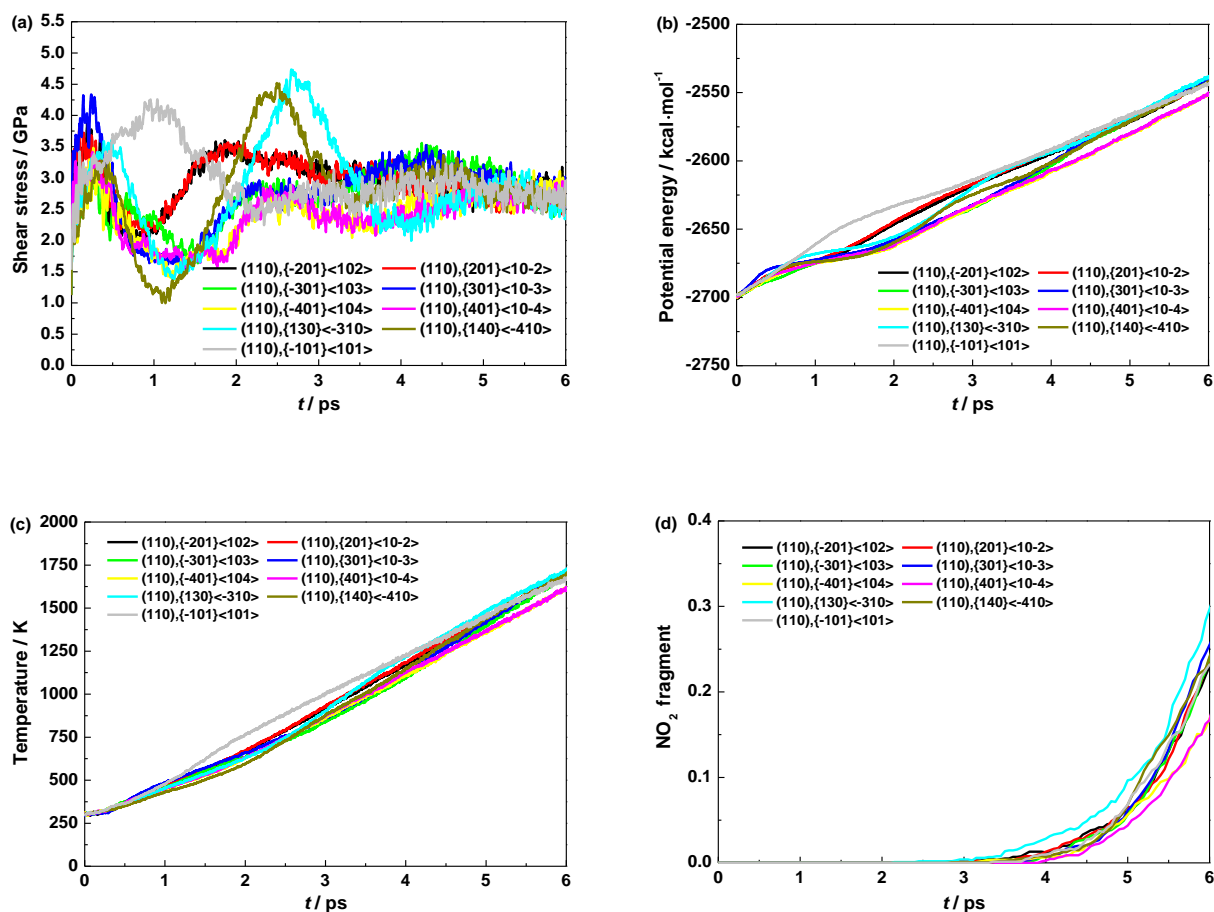

**Fig. S3** Time evolutions of shear stress (a), potential energy per HMX molecule (b), temperature (c), and NO<sub>2</sub> fragment per HMX molecule (d) for the eight possible slip systems along shock direction normal to the (110) plane during shear simulations.

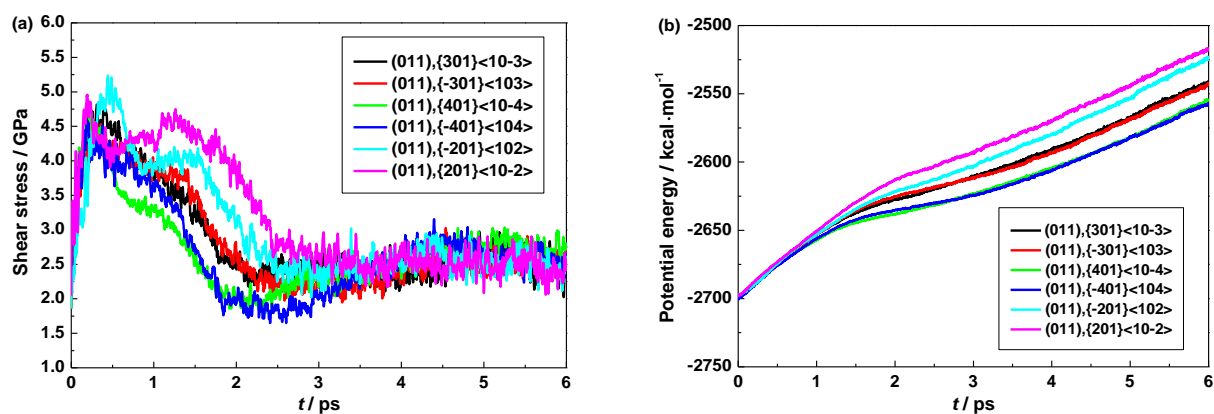

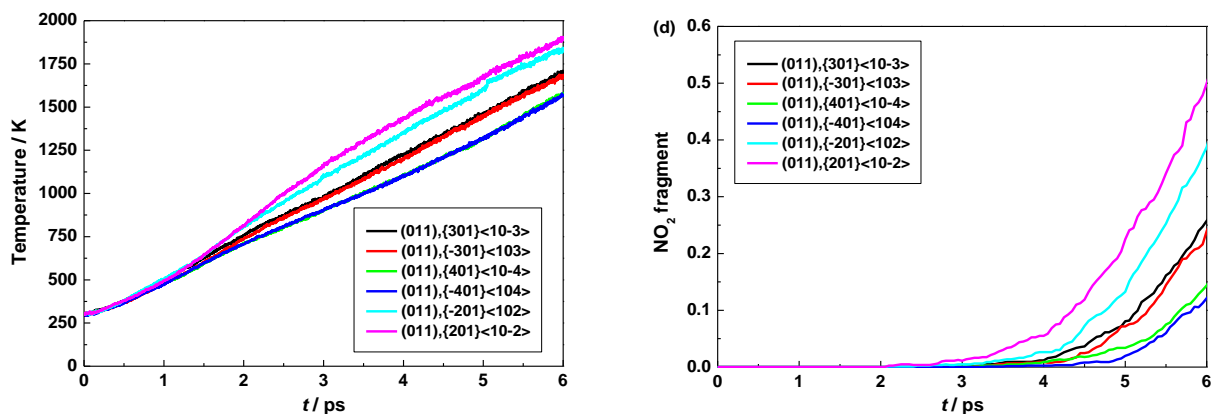

**Fig. S4** Time evolutions of shear stress (a), potential energy per HMX molecule (b), temperature (c), and NO<sub>2</sub> fragment per HMX molecule (d) for the eight possible slip systems along shock direction normal to the (011) plane during shear simulations.

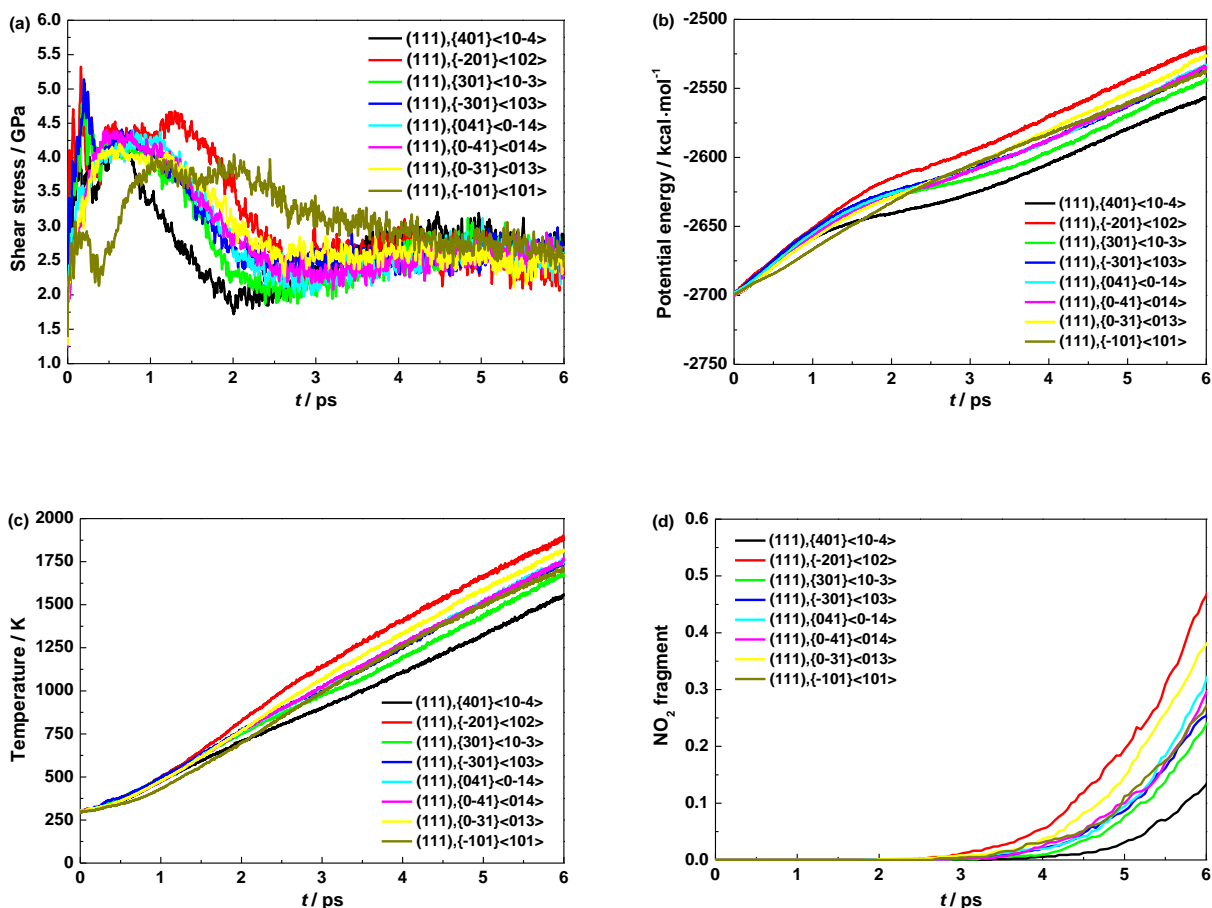

**Fig. S5** Time evolutions of shear stress (a), potential energy per HMX molecule (b), temperature (c), and NO<sub>2</sub> fragment per HMX molecule (d) for the eight possible slip systems along shock direction normal to the (111) plane during shear simulations.

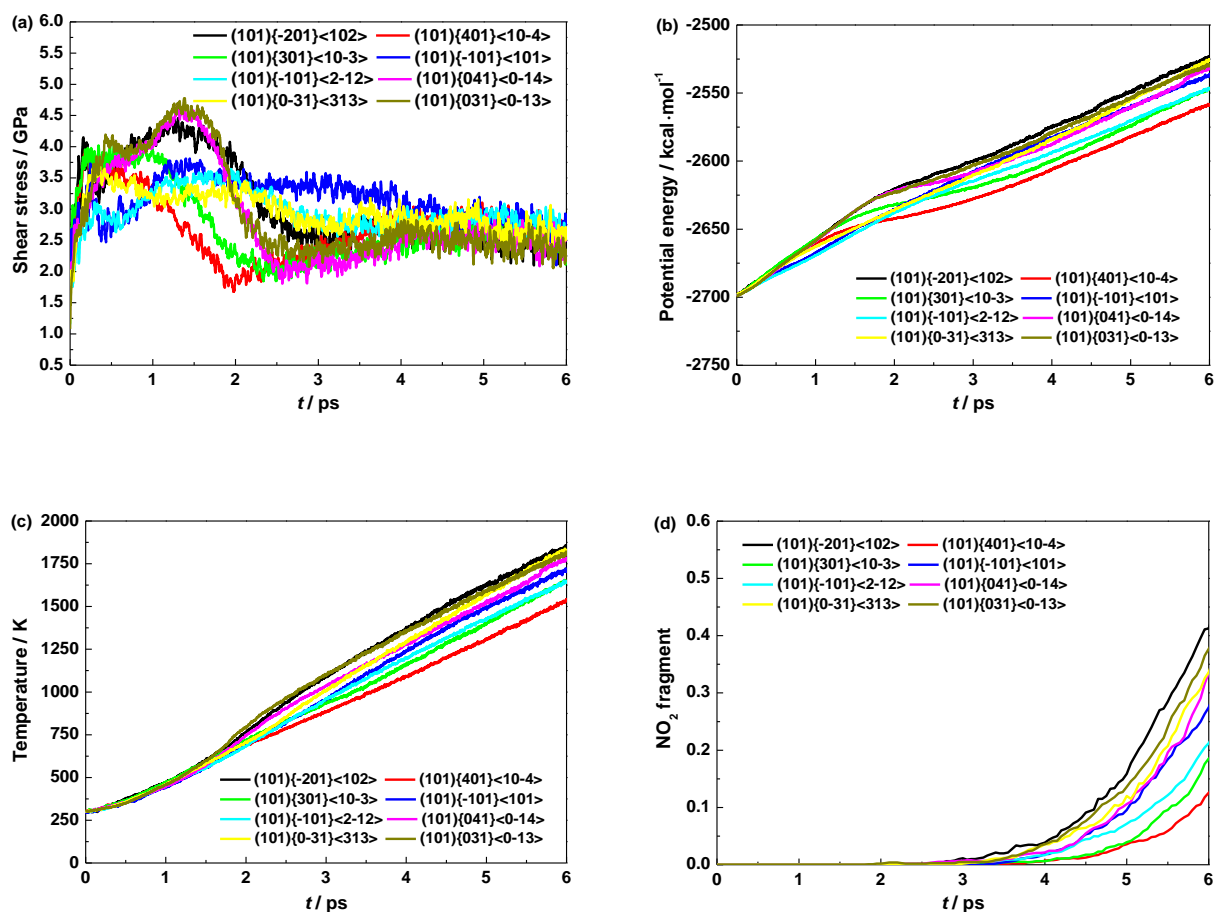

**Fig. S6** Time evolutions of shear stress (a), potential energy per HMX molecule (b), temperature (c), and NO<sub>2</sub> fragment per HMX molecule (d) for the eight possible slip systems along shock direction normal to the (101) plane during shear simulations.

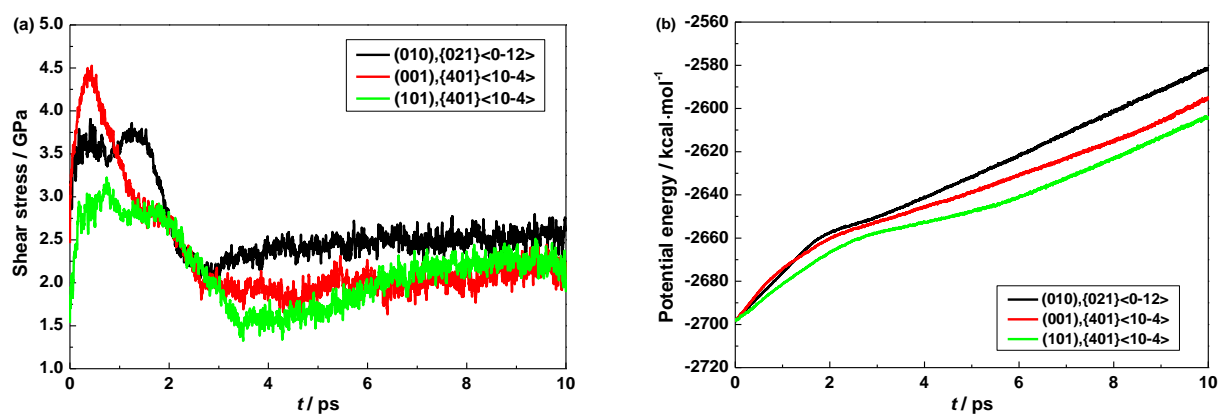

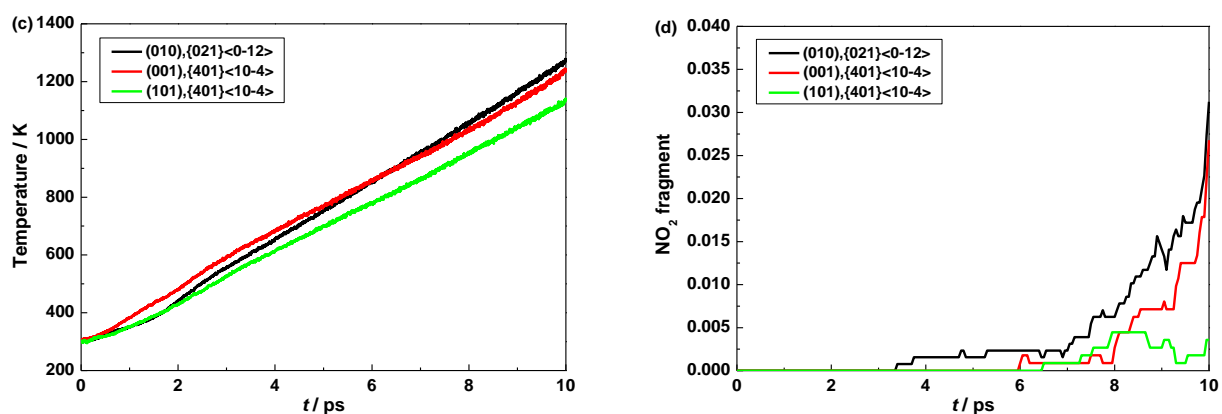

**Fig. S7** Time evolutions of shear stress, potential energy per HMX molecule, temperature, and NO<sub>2</sub> product per HMX molecule for the (010), (001), and (101) shock planes during shear simulations at shear rate 0.25 ps<sup>-1</sup>

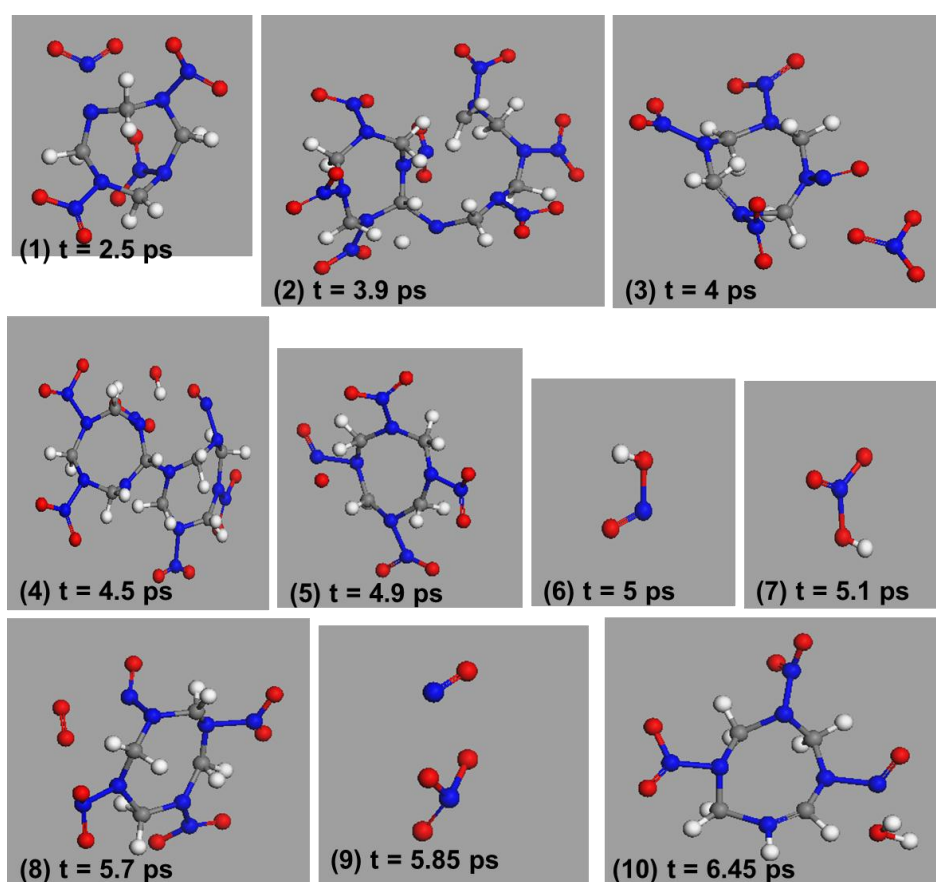

**Fig. S8** The snapshots of reaction products at the first time of their appearances from the MD trajectories for the (010) shock plane.  $C_4H_8O_8N_8$  (297)  $\rightarrow$   $C_4H_8O_6N_7$  (1283) +  $O_2N$  (1284); (2)  $C_4H_8O_6N_7$  (1281) +  $C_4H_8O_8N_8$  (1245)  $\rightarrow$   $C_8H_{15}O_{14}N_{15}$  (1349) + H (1350); (3)  $C_4H_8O_{10}N_9$  (1344)  $\rightarrow$   $O_3N$  (1362) +  $C_4H_8O_7N_8$  (1361); (4)  $C_8H_{16}O_{12}N_{14}$  (1427)  $\rightarrow$   $C_8H_{15}O_{11}N_{14}$  (1522) + HO (1523); (5)  $C_4H_8O_8N_8$  (707)  $\rightarrow$   $C_4H_8O_7N_8$  (1680) + O (1681); (6)  $O_2N$  (1444) + H (1718)  $\rightarrow$   $HO_2N$  (1740); (7) H (1459) +  $O_3N$  (1653)  $\rightarrow$   $HO_3N$  (1792); (8)  $C_4H_8O_9N_8$  (2275)  $\rightarrow$   $O_2$  (2334) +  $C_4H_8O_7N_8$  (2333); (9)  $O_4N_2$  (2157)  $\rightarrow$  ON (2532) +  $O_3N$  (2533); (10)  $C_4H_{10}O_6N_7$  (3315)  $\rightarrow$   $H_2O$  (3402) +  $C_4H_8O_5N_7$  (3401). The numbers in brackets are molecule ID.

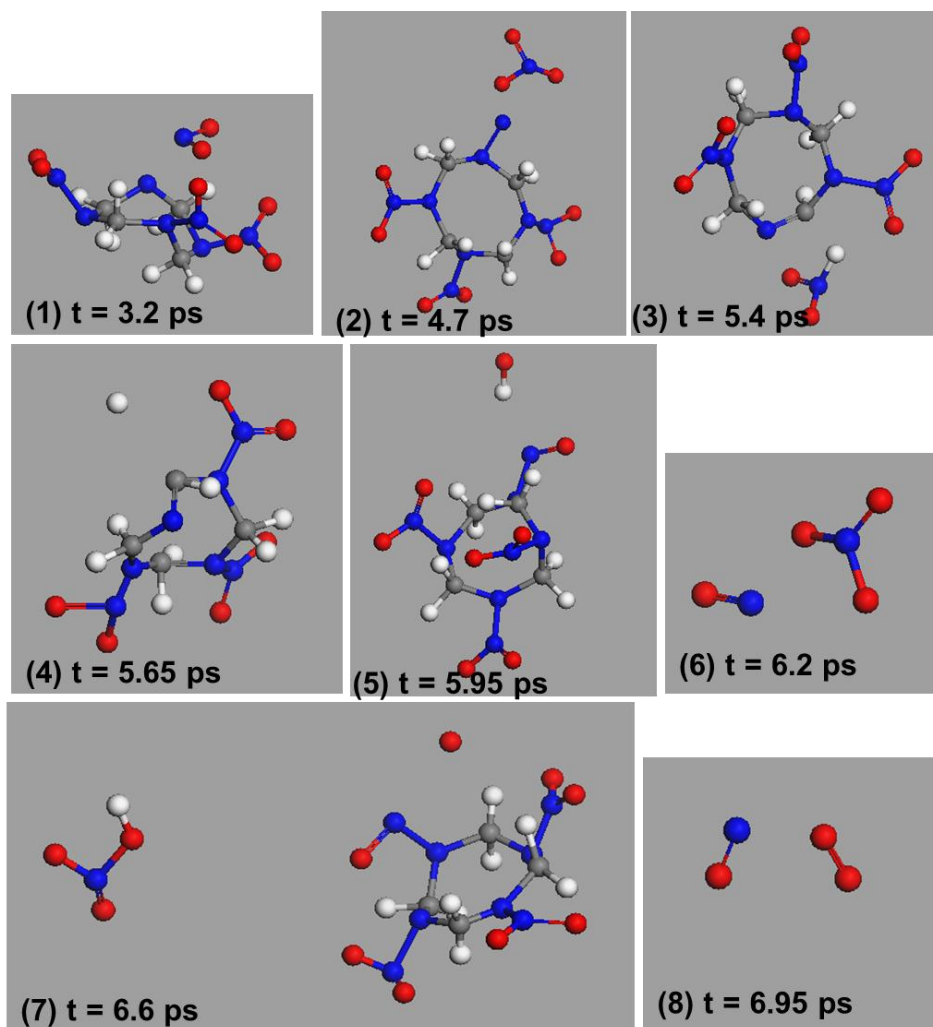

**Fig. S9** The snapshots of reaction products at the first time of their appearances from the MD trajectories for the (101) shock plane. (1)  $C_4H_8O_8N_8$  (474)  $\rightarrow C_4H_8O_6N_7$  (1121) +  $O_2N$  (1122); (2)  $C_4H_8O_9N_9$  (1149)  $\rightarrow C_4H_8O_6N_8$  (1168) +  $O_3N$  (1169); (3)  $C_4H_8O_8N_8$  (1272)  $\rightarrow C_4H_7O_6N_7$  (1290) +  $HO_2N$  (1291); (4)  $C_4H_8O_6N_7$  (1302)  $\rightarrow C_4H_7O_6N_7$  (1388) +  $H$  (1389); (5)  $C_4H_9O_8N_8$  (1493)  $\rightarrow C_4H_8O_7N_8$  (1519) +  $HO$  (1520); (6)  $O_4N_2$  (1490)  $\rightarrow ON$  (1669) +  $O_3N$  (1670); (7)  $C_4H_8O_8N_8$  (1108)  $\rightarrow C_4H_8O_7N_8$  (2136) +  $O$  (2137),  $O_2N$  (1152) +  $HO$  (1520)  $\rightarrow HO_3N$  (2084); (8)  $O_3N$  (2374)  $\rightarrow O_2$  (2435) +  $ON$  (2434). The numbers in brackets are molecule ID.

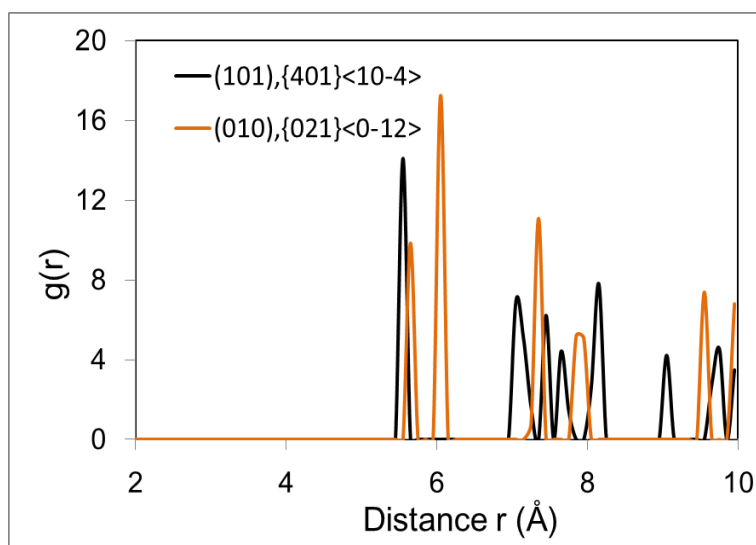

**Fig. S10** The radial distribution function  $g(r)$  based on the molecular center of mass for the (010) and (101) shocked systems after energy minimization
